# Supplementary material for: Defective TiO2 composite photoanodes with surface-modified Prussian blue for efficient photoelectrochemical water splitting
Source: Royal Society of Chemistry journal article supplement (doi:10.1039/d4cy00895b), 2024-01-01
Supplement: d4cy00895b1.pdf [file d4cy00895b1.pdf]

**Defective TiO<sub>2</sub> composite photoanodes with surface-modified prussian  
blue for efficient photoelectrochemical water splitting**

Lipeng Wang,<sup>a</sup> Rui Wang,<sup>a</sup> Longjie Lai,<sup>a\*</sup> Li Zhang,<sup>b</sup> Waqar Younas,<sup>a</sup> Guobing  
Mao,<sup>a</sup> and Qi Liu<sup>a\*</sup>

<sup>a</sup> *School of Materials Science and Engineering, Anhui Polytechnic University, Wuhu  
241000, China*

<sup>b</sup> *Faculty of Institute of Photoelectronics Thin Film Devices and Technique of Nankai  
University, Nankai University, Tianjin 30071, China*

\* *Corresponding author: modieer\_67@ahpu.edu.cn; longjie\_lai@163.com;*

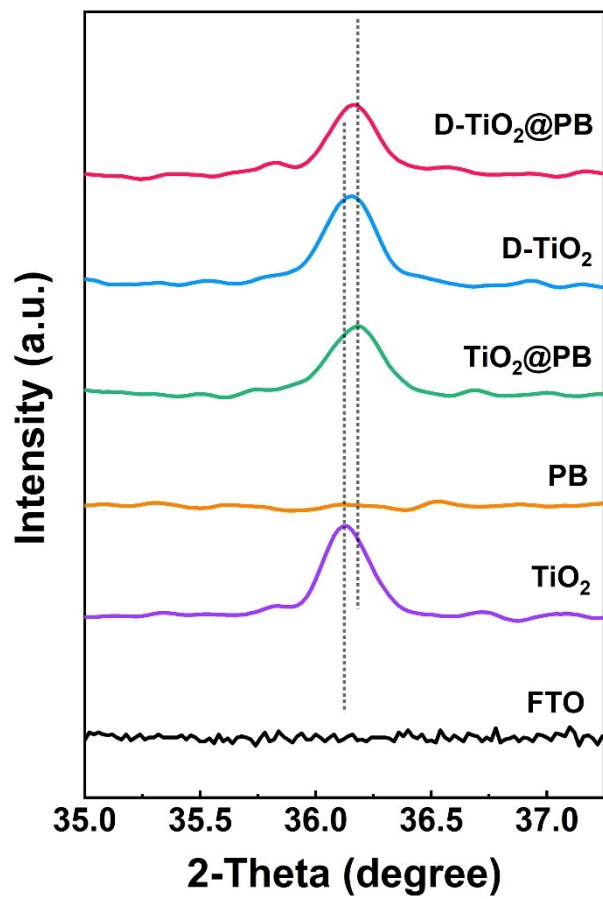

Fig. S1 XRD pattern of different samples in the  $2\theta$  range of  $35^\circ$ - $40^\circ$ .

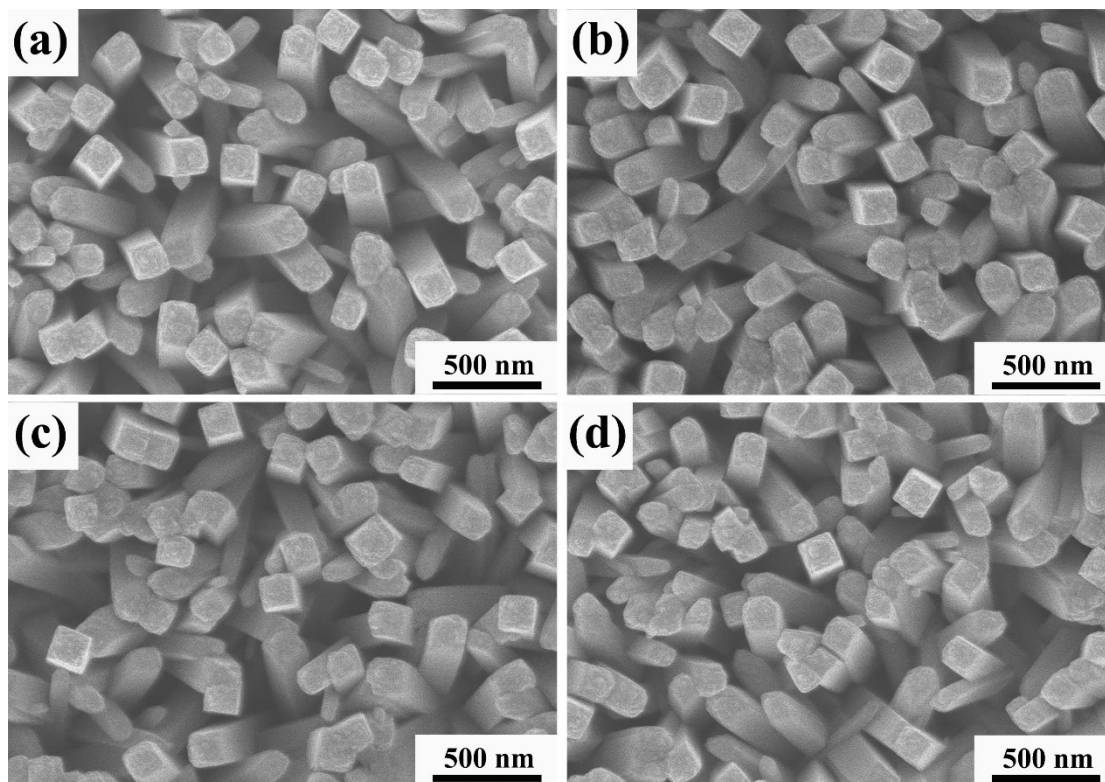

Fig. S2 SEM images of  $\text{TiO}_2$  with different electrochemical reduction times:

(a) 2 s, (b) 5 s, (c) 10 s, (d) 15s.

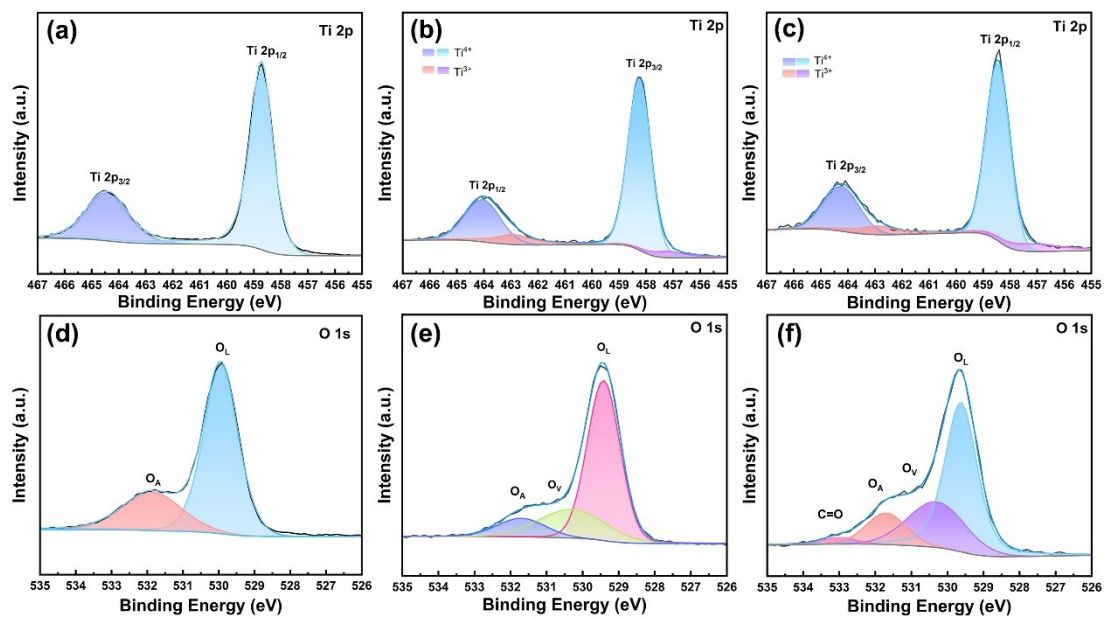

Fig. S3 The XPS spectra for the Ti (a-c), O (d-f) of  $\text{TiO}_2$ ,  $\text{D-TiO}_2$  and  $\text{D-TiO}_2@PB$ .

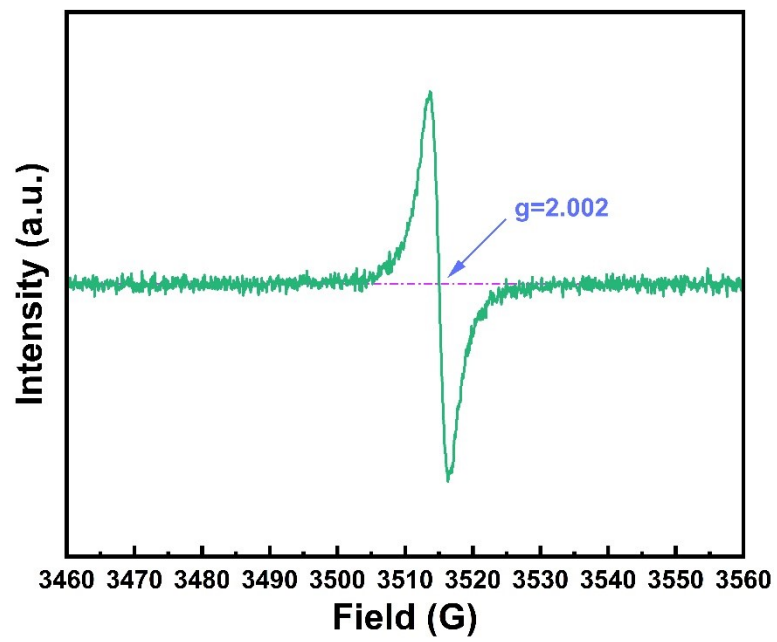

Fig. S4 The EPR spectra of D-TiO<sub>2</sub>.

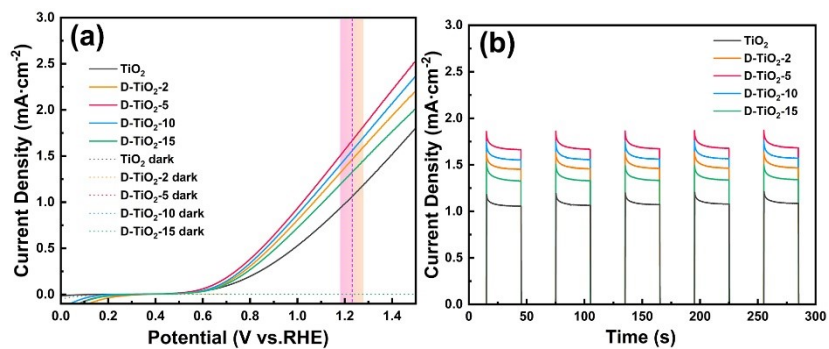

Fig. S5 (a) LSV curves of different photoanodes in the dark (dashed lines) and under full-spectrum light (solid lines). (b) Transient photocurrent response of prepared samples.

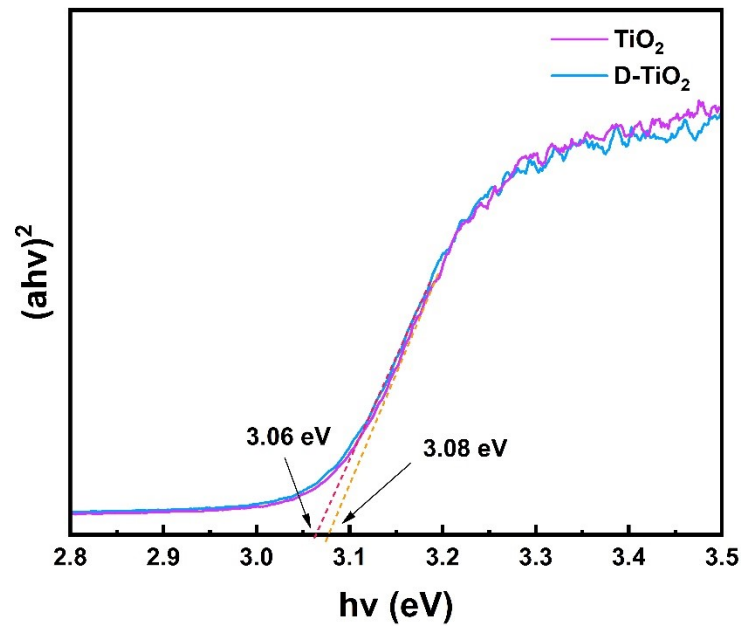

Fig. S6 the Kubelka-Munk function correlating to the  $\text{TiO}_2$  and  $\text{D-TiO}_2$ .

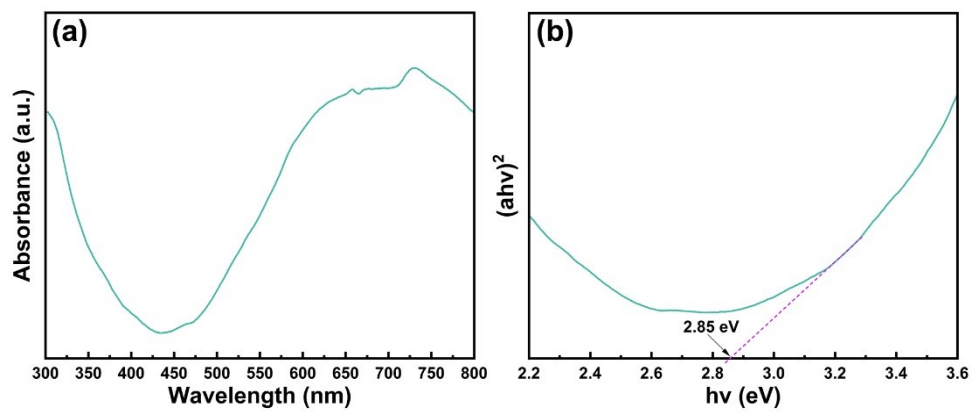

Fig. S7 (a) the UV-vis absorption spectra, and (b) the Kubelka-Munk function correlating to the PB.
